# 1 Improved fluorescent proteins for dual-color post-embedding CLEM

2 Dingming Peng<sup>1, 4, 8</sup>, Na Li<sup>1, 2, 3, 5, 8</sup>, Wenting He<sup>1</sup>, Kim Ryun Drasbek<sup>5</sup>, Tao Xu<sup>4, 6\*</sup>, Mingshu Zhang<sup>1, 4\*</sup>  
3 and Pingyong Xu<sup>1, 4, 6, 7\*</sup>

4 <sup>1</sup> Key Laboratory of RNA Biology, Institute of Biophysics, Chinese Academy of Sciences, Beijing, China.

5 <sup>2</sup> Sino-Danish College, University of Chinese Academy of Sciences, Beijing, China.

6 <sup>3</sup> Sino-Danish Center for Education and Research, Beijing, China.

7 <sup>4</sup> Bioland Laboratory (Guangzhou Regenerative Medicine and Health Guangdong Laboratory), 510005, Guangzhou, China.

8 <sup>5</sup> Center of Functionally Integrative Neuroscience, Dept of Clinical Medicine, Aarhus University, Aarhus, Denmark.

9 <sup>6</sup> National Laboratory of Biomacromolecules, CAS Center for Excellence in Biomacromolecules, Institute of Biophysics, Chinese  
10 Academy of Sciences, Beijing, China.

11 <sup>7</sup> College of Life Sciences, University of Chinese Academy of Sciences, Beijing, China.

12 <sup>8</sup> These authors contributed equally.

13 \*e-mail: [pyxu@ibp.ac.cn](mailto:pyxu@ibp.ac.cn); [zhangmingshu@ibp.ac.cn](mailto:zhangmingshu@ibp.ac.cn); [xutao@ibp.ac.cn](mailto:xutao@ibp.ac.cn)

14

## 15 Abstract

16 Post-embedding correlative light and electron microscopy (CLEM) has the advantage of high-precision  
17 registration and enables light and electron microscopy imaging of the same slice. However, its broad  
18 application has been hampered by the limited available fluorescent proteins (FPs) and low signal-to-  
19 background ratio (SBR). Here, we developed a green photoswitchable FP, mEosEM-E with substantially  
20 high on/off contrast in EM samples embedded in Epon resin which maximally preserves cellular  
21 structures but quenches the fluorescence of FPs. Taking advantage of the photoswitching property of  
22 mEosEM-E, the autofluorescence background from the resin was significantly reduced by a subtraction-  
23 based CLEM (sCLEM) method. Meanwhile, we identified a red fluorescent protein (RFP) mScharlet-H  
24 that exhibited higher brightness and SBR in resin than previously reported RFPs. With mEosEM-E and  
25 mScharlet-H, dual-color post-Epon-embedding CLEM images with high SBR and no cross-talk signal  
26 were successfully performed to reveal the organization of nucleolar proteins. Moreover, a dissection of  
27 the influences of different EM sample preparation steps on the fluorescence preservation for several RFPs  
28 provides useful guidance for further probe development.

29

30 **Keywords:** Dual-color CLEM; high SBR; RSFP; probe development

31

## 32 Introduction

33 Light microscopy (LM) highlights and discriminates one or a few biomolecules using fluorescent  
34 labeling. Electron microscopy (EM), on the other hand, reveals the ultrastructural context of the cell  
35 where the biomolecules reside. Correlative light and electron microscopy (CLEM) [1] integrates the  
36 information of both LM and EM in a complementary way, and thus provides localization, structural and  
37 functional insights into the biomolecular machines, and shows great application prospects in cellular  
38 physiology [2], virology [3] and neuroscience [4]. In CLEM imaging, LM can not only indicate the  
39 location of the target protein, but also be used as a guide to quickly find slices containing target cells or  
40 proteins in a large number of EM slices, and to quickly locate the cell on the target slice for EM imaging.  
41 The advantage of fluorescence navigation is unique and is not possessed by EM labeling techniques,

42 such as immunogold labeling, APEX-gold [5], APEX2 [6], miniSOG [7], and other metal [8] or chemical  
43 [9] tags.

44

45 Same as any other imaging technique, the practical performance of CLEM is largely determined by the  
46 labeling probe. However, most fluorescent proteins (FPs) experienced severe fluorescence loss during  
47 standard EM sample preparation, making it difficult to perform LM and EM on the same section that can  
48 be correlated with high precision. To circumvent this problem, several strategies have been used. Pre-  
49 embedding CLEM [10, 11] obtains fluorescence microscopy (FM) image ahead of EM sample  
50 preparation, avoiding fluorescence quenching caused by a series of chemical treatments. However,  
51 because of the morphology distortion during EM sample preparation and sectioning, it suffers from poor  
52 registration between FM and EM images. Several modified EM sample preparation protocols with no or  
53 reduced OsO<sub>4</sub> concentration have been reported to preserve sufficient fluorescence signal for post-  
54 embedding CLEM [12, 13], however, deteriorated EM images were often observed.

55

56 In 2015, Paez-Segala et al. engineered the first FP, mEos4b, to retain fluorescence after 1% OsO<sub>4</sub>  
57 treatment [14]. However, the hydrophilic GMA resin was used for mEos4b-labeled samples. Compared  
58 to the GMA resins, the hydrophobic Epon resin has advantages in maintaining cellular ultrastructure as  
59 well as sectioning quality [3, 15] due to its higher toughness and hardness. Nevertheless, Epon resin  
60 undermines fluorescence more severely. To solve this problem, we have previously developed mEosEM  
61 [16], an FP that survives 1% OsO<sub>4</sub> fixation and Epon embedding and enables super-resolution CLEM  
62 (SR-CLEM) due to the preserved photomodulable property. Recently, Tanida et al. found that mKate2  
63 [17], mCherry2, mWasabi, and GoGFP-v0 [18] could also preserve fluorescence after standard EM  
64 sample preparation and dual-color CLEM imaging was achieved using mWasabi and mcherry2. However,  
65 both the green and the red channel images showed very low signal-to-background ratio (SBR), making  
66 it difficult to distinguish the real fluorescence signals from that of the background or noises.

67

68 Low SBR can be attributed to three aspects. First, most of the fluorescence signals of the FPs mentioned  
69 above are quenched after TEM sample preparation, and only a small amount of the remaining  
70 fluorescence signal is used for CLEM imaging. Second, the thickness of ultrathin sections is generally  
71 only about 100 nm, and the number of FP-labeled molecules in the sections is limited. Third, the Epon  
72 resin has strong autofluorescence, especially in the green channel (Figure S1). Therefore, developing FPs  
73 with high in-resin SBR and repressing the autofluorescence background are effective ways to solve the  
74 problem. For dual-color CLEM, another phenomenon worth noting is that red fluorescent proteins (RFPs)  
75 on Epon-embedded slices emitted green fluorescence when illuminated with 488-nm laser (Figure S8),  
76 which interfered the signal in the green channel. Therefore, FPs and imaging methods that can solve  
77 these problems are desirable.

78

79 Reversibly photoswitchable FP (RSFP) can be utilized to suppress the unmodulatable fluorescent  
80 background and enhance the signal contrast by means of optical lock-in detection (OLID) [19],  
81 synchronously amplified fluorescence image recovery (SAFIRE) [20, 21] and out-of-phase imaging after  
82 optical modulation (OPIOM) [22]. We speculated that similar strategies could be applied with an OsO<sub>4</sub>-  
83 and Epon-resistant RSFP to eliminate the resin background and the RFP crosstalk signal. In this study,  
84 we developed a fluorescence background-reduced CLEM method (sCLEM) using a simple subtraction  
85 of images of RSFPs at fluorescent on- and off-states and efficiently extracted the fluorescence signals of  
86 the FPs from that of the background. The higher on/off contrast of the RSFP, the better SBR of the final  
87 image. Therefore, we evolved a mEosEM variant termed mEosEM-E, with high on-state brightness and  
88 on/off contrast ratio after standard EM sample preparation, and demonstrated its utility in sCLEM  
89 imaging.

90

91 On the other hand, despite a few FPs were reported for post-Epon-embedding CLEM [14, 16-18], all  
92 these probes were discovered by OsO<sub>4</sub> resistance assay, the results of which are sometimes inconsistent  
93 with the final performance of the probe in CLEM imaging. As a matter of fact, nearly every step during  
94 EM sample preparation will quench the fluorescence of FPs. However, a comparative study that dissects  
95 the influence of each step on fluorescence signal reduction is lacking. In order to develop an optimal RFP  
96 that can be coupled with mEosEM-E for dual-color CLEM imaging, we assessed the fluorescence  
97 preservation of nine commonly used RFPs after each key step of EM sample preparation, including pre-  
98 fixation, OsO<sub>4</sub> fixation, ethanol dehydration, and Epon embedding. The results showed that the OsO<sub>4</sub>  
99 resistance assay is not the optimal criterion for CLEM probe development, while the performance of a  
100 probe should be evaluated in the final sample section. mScarlet-H, which preserved the highest on-  
101 section fluorescence and SBR among the nine RFPs tested, is the best RFP reported to date for the same  
102 section post-Epon-embedding CLEM. Finally, high SBR and accurate dual-color CLEM imaging of  
103 nucleolar proteins was successfully achieved for the first time using mEosEM-E and mScarlet-H double  
104 labeling.

105

## 106 **Results**

### 107 *Green mEosEM-E with high SBR for sCLEM*

108 To obtain a CLEM probe with high on/off contrast, we chose mEosEM as the template. mEosEM is a  
109 photoconvertible FP (PCFP) that can be converted to an RFP upon 405-nm illumination, but it also has  
110 photoswitching property at the green state like an RSFP. After the TEM sample preparation, mEosEM  
111 lost the characteristic of light conversion while retaining the photoswitching property[16]. However, this  
112 photoswitching property was not used for background removal in CLEM imaging, and the on/off contrast  
113 was not optimized for this use.

114

115 Our previous study revealed that the first amino acid of the chromophore tripeptide (XYG) of the Eos FP  
116 family not only determines the photomodulable type (RSFP or PCFP) of the FP but also greatly affect its  
117 photoswitching property [23]. We reasoned that because the first amino acid of the chromophore is  
118 located inside the barrel structure of the FP, mutagenesis at this site would have no negative effect on the  
119 resistance to the EM sample preparation, while largely tuning the photoswitching contrast. As expected,  
120 saturation mutagenesis at His63 of mEosEM produced a series of RSFP mutants displaying a variety of  
121 switching contrast and kinetics (Figure S2). We found that among several improved mutants, mEosEM-  
122 E (mEosEM H63E) displayed substantially improved contrast, in other words, largely reduced  
123 normalized residual fluorescence as compared to mEosEM after TEM sample preparation (Figure 1A).  
124 The on/off contrast ratio of mEosEM-E is ~2.7-fold higher than that of mEosEM on average (Figure 1B).

125

126 To demonstrate the superiority of mEosEM-E in CLEM, we imaged HEK 293T cell sections expressing  
127 mitochondria-targeting mEosEM-E or mEosEM. Fluorescence image sequences were acquired under the  
128 illumination of the 488-nm laser alone followed by the 488- and 405-nm lasers together. We termed the  
129 images acquired without the illumination of 405-nm laser as “OFF images” and those with 405-nm laser  
130 as “ON images”. Every 20 frames of the OFF and subsequent ON images from the image stack were  
131 averaged respectively. Then, the subtraction was performed pixel by pixel between the averaged ON and  
132 OFF images to acquire the final “ON – OFF image” (Figure S3). We named the subtraction-based LM  
133 as sLM, and accordingly CLEM as sCLEM. It can be clearly seen that the autofluorescent background  
134 in the OFF image was almost completely removed in the ON – OFF image of mEosEM-E-labeled cells  
135 (Figure 1C). For both mEosEM and mEosEM-E, the SBR in the ON – OFF image was significantly  
136 increased compared to the ON image (Figure 1D & E). Notably, the SBR of mEosEM-E fluorescence is  
137 3.46-fold higher than that of mEosEM in the ON – OFF image (Figure 1F). Further exploration revealed  
138 that the substantial higher SBR in the ON – OFF image of mEosEM-E is mainly attributed to its higher  
139 SBR in the ON image (Figure S4).

140

141 Next, same section post-Epon-embedding sCLEM was demonstrated in HEK 293T cells, of which the  
142 nuclear lamina (Figure 1G-I) and the mitochondria matrix (Figure 1J-L) were labeled by mEosEM-E,  
143 separately. The results showed that high SBR and nearly background-free fluorescence images were  
144 obtained and well aligned with the EM images.

145

146 Altogether, mEosEM-E proved to be a better CLEM probe for high SBR imaging and is potentially useful  
147 for investigating proteins of low expression level.

148

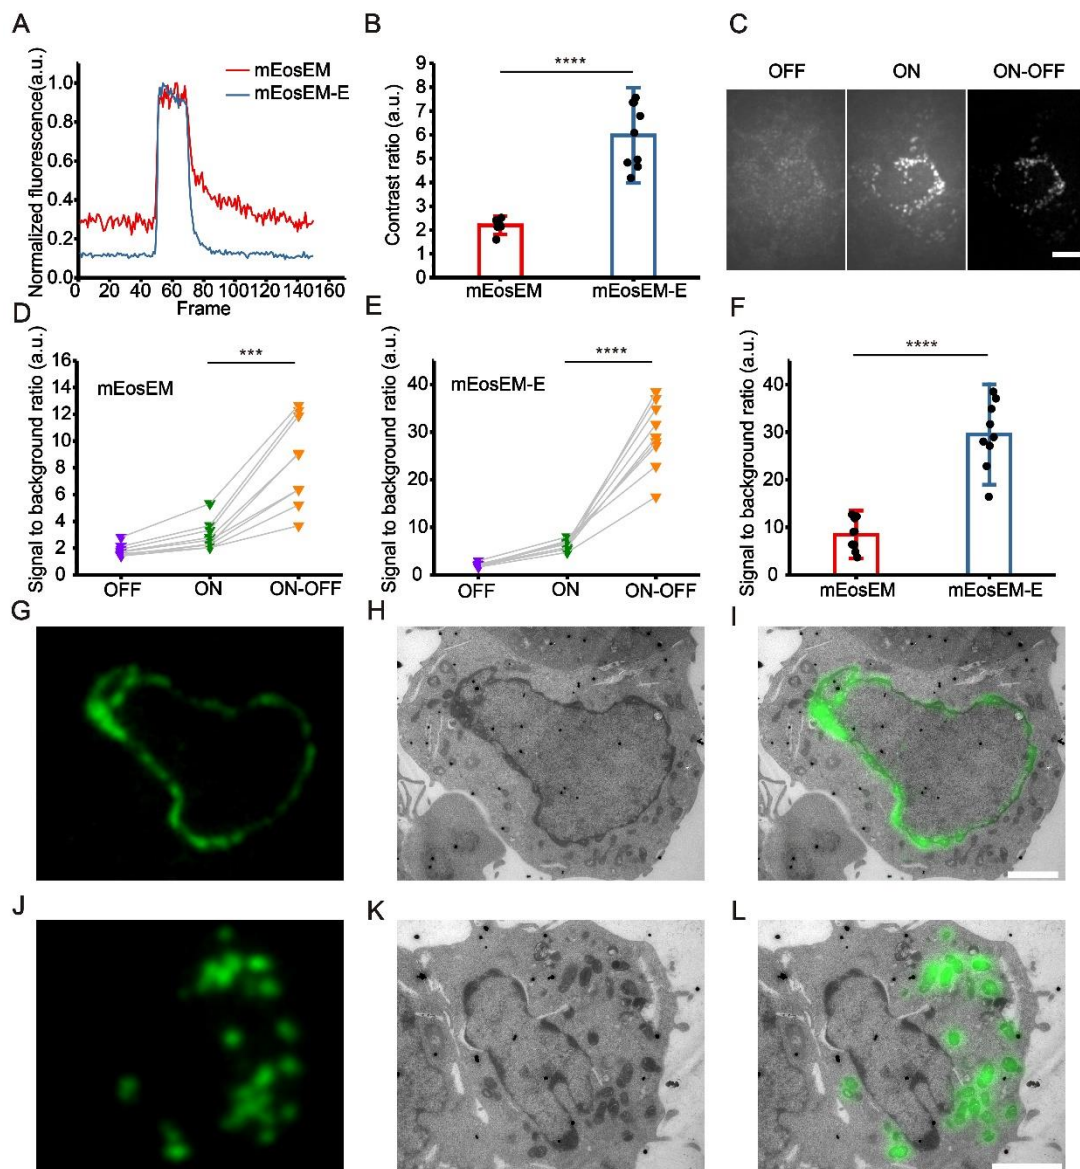

149

150 **Figure 1.** mEosEM-E is an improved green RSFP for high SBR sCLEM imaging. (A) Representative  
151 normalized photoswitching curves of Epon-embedded HEK 293T cell sections (100 nm) expressing  
152 mitochondria-targeted mEosEM (red) and mEosEM-E (blue). Samples were excited and switched off  
153 with the 488-nm laser (0.41 kW/cm<sup>2</sup>), and switched on with the 405-nm (0.21 kW/cm<sup>2</sup>) laser for 1 s. (B)  
154 Statistics photoswitching contrast ratio of mEosEM (red) and mEosEM-E (blue). Data are summarized  
155 in Table S1. Bars represent mean  $\pm$  SD. P values were determined with two-tailed t-test (n = 9). \*\*\*\*  
156 indicates p < 0.0001. (C) Representative OFF (left), ON (middle), and ON - OFF (right) images of  
157 Epon-embedded HEK 293T cell sections (100 nm) expressing mitochondria targeting mEosEM-E. Scale  
158 bar, 5  $\mu$ m. (D, E) SBR of mEosEM- (D) and mEosEM-E- (E) labeled cell samples in OFF (purple), ON

159 (green), and ON — OFF (orange) images. Data are summarized in Table S2 & 3. P values were  
160 determined with two-tailed t-tests (n = 9). \*\*\* indicates p < 0.001, \*\*\*\* indicates p < 0.0001. (F)  
161 Statistics SBR of mEosEM (red) and mEosEM-E (blue) in ON — OFF images. Two-tailed t-tests were  
162 performed (n = 9). \*\*\*\* indicates p < 0.0001. Data are summarized in Table S4. (G-L) Post-Epon-  
163 embedding CLEM of mEosEM-E. FM, EM, and CLEM images of nuclear envelope (G-I) and  
164 mitochondria (J-L) labeled by mEosEM-E (100 nm slices). Scale bars, 2  $\mu$ m.

165

#### 166 *Identification of mScarlet-H as a high-performance red CLEM probe*

167 To find the optimal red probe for dual-color CLEM, nine commonly used RFPs were chosen for  
168 investigation: mScarlet, mScarlet-H, mScarlet-I, FusionRed-MQV, mRuby3, mApple, tdTomato,  
169 mKate2 [17], mCherry2 [18], of which the latter two were previously demonstrated feasible for post-  
170 Epon-embedding CLEM. Instead of performing only the OsO<sub>4</sub>-resistant assay reported in the previous  
171 papers [16-18], we thoroughly analyzed the fluorescence preservation after each key step of the EM  
172 sample preparation procedure, including aldehyde fixation, OsO<sub>4</sub> fixation, ethanol dehydration, Epon  
173 embedding, and high-temperature polymerization.

174

175 A direct comparison of the absolute fluorescence intensity in fixed cells, which is a representative of the  
176 practical performance of the probe, showed that pre-fixation with 2% formaldehyde and 2.5%  
177 glutaraldehyde already significantly reduced fluorescence intensities of several RFPs, up to 50% of their  
178 initial value. While a few others, such as mScarlet-H and FusionRed-MQV were much less affected by  
179 pre-fixation, indicating a varied response among different RFPs (Figure S5). The fluorescence  
180 intensities of all RFPs were markedly reduced after 1% OsO<sub>4</sub> fixation, nevertheless, mScarlet-I, mRuby3,  
181 mScarlet, and mScarlet-H are the top 4 FPs retaining high residue fluorescence, which are all  
182 substantially higher than that of the previously reported mKate2 and mCherry2 (Figure 2A). However,  
183 the subsequent dehydration step using 100% ethyl alcohol changed the ordering of RFPs, making only  
184 mRuby3 stand out, while others diminished to a similar level (Figure 2B). We speculated that the  
185 advantage of mRuby3 at this stage is due to the insensitivity of mRuby3 to the dehydration treatment,  
186 which was later confirmed by the results from dehydration treatment without OsO<sub>4</sub> fixation (Figure S6).  
187 Notably, the robustness of mRuby3 to the dehydration treatment following 1% OsO<sub>4</sub> fixation is not as  
188 strong as that to a single dehydration treatment, indicating a superimposed effect of the two treatments.

189

190 Next, we performed an *in vitro* thermostability test at 60 °C to mimic the effect of high-temperature on  
191 fluorescence preservation during Epon resin polymerization. Among nine selected RFPs, mScarlet-H  
192 showed the best thermostability that is significantly higher compared to the others (Figure 2C). After  
193 complete EM sample preparation, mScarlet-H showed the highest residue fluorescence, followed by  
194 mScarlet-I, which are both significantly higher than the previously reported mKate2 and mCherry2,  
195 while the residue fluorescence of mRuby3 was surprisingly low (Figure 2D). Statistic results showed that  
196 mScarlet-H has the highest SBR among tested RFPs (Figure S7). We speculated that mRuby3 might be  
197 super sensitive to the Epon embedding procedure. In addition, even though mApple and tdTomato show  
198 comparable fluorescence residue to mKate2 and mCherry2 after OsO<sub>4</sub> fixation and dehydration treatment,  
199 and even better thermostability than mCherry2 and mKate2, they totally lose their fluorescence after  
200 complete EM sample preparation (data not shown).

201

202 Additionally, we also measured the photostability of these RFPs on standard EM sample sections under  
203 the illumination condition of CLEM imaging. mScarlet-H had higher photostability than other RFPs  
204 except mRuby3 (Figure 2E, F).

205

206 Taken together, we recommend mScarlet-H as the best red probe for standard CLEM as it has the highest  
207 in-resin fluorescence and a preferable photostability among RFPs after complete TEM sample  
208 preparation.

209

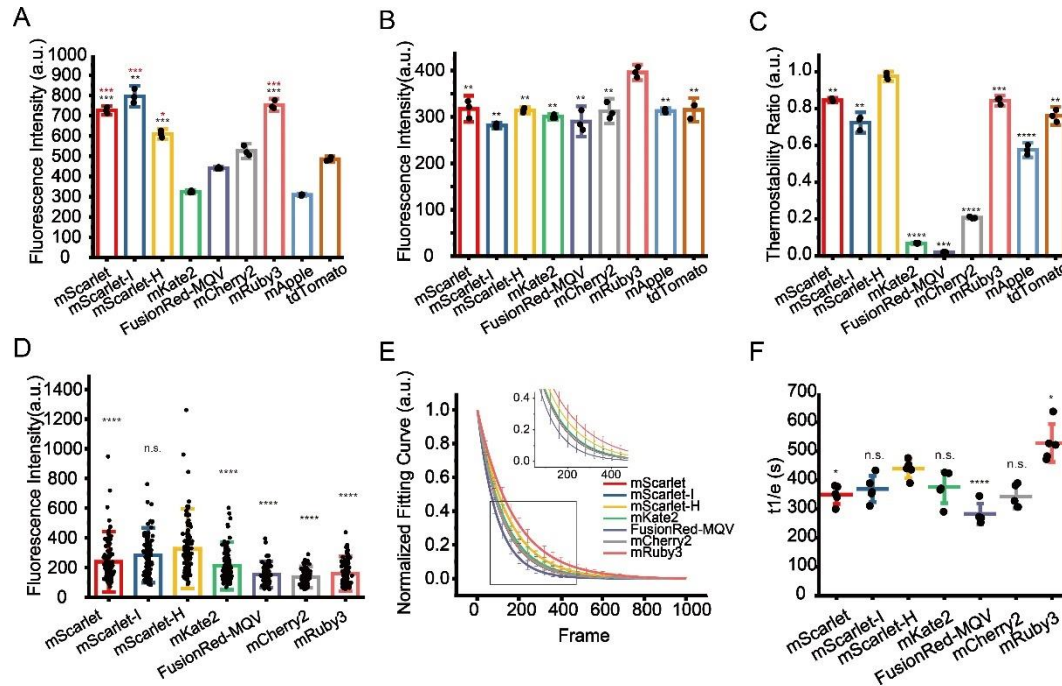

210

211 **Figure 2.** Identification of optimal RFPs for CLEM imaging. (A) Residual fluorescence intensity of RFPs  
 212 after 1% OsO<sub>4</sub> post-fixation. Red stars represent comparisons to mCherry2, black stars represent  
 213 comparisons to mKate2. (B) Residual fluorescence intensity of RFPs after 1% OsO<sub>4</sub> post-fixation  
 214 followed by absolute ethanol dehydration. (C) Thermostability of RFPs at 60 °C. (D) Fluorescence  
 215 intensity of RFPs on Epon-embedded sections (100 nm). (E) Normalized photobleaching curves of RFPs  
 216 on Epon-embedded sections (100 nm). Enlarged view of the boxed area is shown on top. (F) Statistics  
 217 of the photobleaching time when the fluorescence intensity of RFPs reduced to 1/e of their initials. Bars  
 218 represent mean ± SD. P values were determined with two-tailed t-tests in (A-C) (n = 3) and (F) (n = 5),  
 219 Mann-Whitney U test was performed in (D) (n = 106). n.s. indicates p > 0.05, \* indicates p < 0.05, \*\*  
 220 indicates p < 0.01, \*\*\* indicates p < 0.001, \*\*\*\* indicates p < 0.0001. Data are summarized in Table S5  
 221 & 9.

222

223 *mScarlet-H is a generalizable red probe for post-Epon-embedding CLEM*

224 To exemplify the utility of mScarlet-H in Epon-embedded same-section CLEM, we constructed  
 225 mScarlet-H fusions with the mitochondria targeting peptide, the endoplasmic reticulum membrane  
 226 protein Sec61β, and histone H2B, individually. Cell sections transiently expressing mScarlet-H fusions  
 227 were prepared according to the standard TEM sample preparation procedure. The fluorescence signal of  
 228 mScarlet-H from thin sections (100 nm) was consecutively recorded for multiple frames. The first 100  
 229 frames were averaged to smooth the background noise and increase the signal-to-noise ratio.  
 230 Mitochondria, endoplasmic reticulum, and Histone H2B were correctly targeted and clearly identified  
 231 under fluorescence microscopy (FM) (Figure 3A, D, G). Next, to obtain the corresponding ultrastructure  
 232 of these cell components, the same sections were subsequently imaged using TEM (Figure 3B, E, H). All  
 233 three structures were successfully aligned with high accuracy (Figure 3C, F, I). These results demonstrate  
 234 that mScarlet-H is a high-performance red probe that can be generalized for same-section CLEM imaging  
 235 of various cellular targets.

236

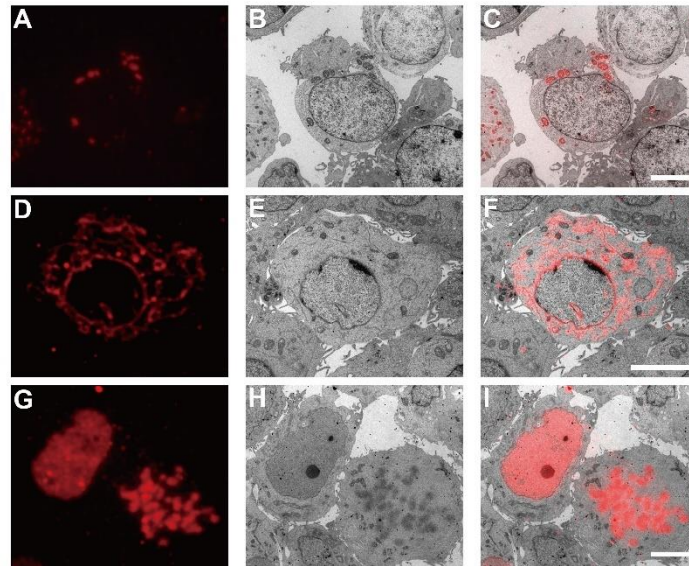

237

238 **Figure 3.** Post-Epon-embedding CLEM imaging by mScarlet-H. FM, EM, and CLEM images of the  
239 mitochondrial matrix (A-C), the endoplasmic reticulum sec61 $\beta$  protein (D-F), and the nucleosome H2B  
240 protein (G-I) labeled by mScarlet-H (100 nm slices). Scale bars, 5  $\mu$ m.

241

242 *Dual-color post-Epon-embedding same-section CLEM using mEosEM-E and mScarlet-H*

243 mScarlet-H and mEosEM-E were then combined to perform dual-color same-section CLEM imaging.

244 The nuclear envelope (laminA) and mitochondria matrix in HEK 293T cells were labeled by mScarlet-H

245 and mEosEM-E, respectively. After standard EM sample preparation, dual-color wide-field FM images

246 of cell sections (100 nm) were sequentially acquired with a 561-nm laser for 100 frames to image

247 mScarlet-H, followed by 20 frames with a 488-nm laser, and 20 frames with 488- plus 405-nm lasers to

248 image mEosEM-E. For the red channel, images were averaged to obtain the final image; while for the

249 green channel, sLM was applied as mentioned above. As shown in Figure 4A, the mScarlet-H -labeled

250 laminA in the red channel exhibited a good nuclear envelope structure with a high SBR. However, in the

251 green channel, regardless of whether mEosEM-E was in the on- (Figure 4B) or off- state (Figure 4C),

252 the SBR of the fluorescence signal was very low. Furthermore, in addition to mEosEM-E-labeled

253 mitochondrial structure, nuclear envelope structure due to mScarlet-H crosstalk could also be observed

254 as indicated by the merged image of mEosEM-E (on-state) and mScarlet-H (Figure 4D, box). Notably,

255 using the photoswitching property of mEosEM-E and the sCLEM method, the structure of mitochondria

256 could be obtained with a very high SBR (Figure 4E). Moreover, the mScarlet-H crosstalk signal was

257 effectively eliminated (Figure 4F) by the sCLEM imaging scheme, as the green signal of mScarlet-H

258 does not possess the photoswitching property. A further investigation showed that the crosstalk

259 phenomenon is universal for all the tested RFPs that survived standard EM sample preparation (Figure

260 S8). A very likely reason is that under high-energy illumination, severe chromophore photoreduction

261 happens that leads to obvious red-to-green photoconversion of the RFPs, a mechanism that has been

262 reported before [24-26].

263

264 Next, we applied dual-color CLEM to investigate how nucleolar proteins are organized in the nucleolus.

265 The nucleolus of mammalian cells has three morphologically distinct components: the fibrillar center

266 (FC), the dense fibrillar component (DFC), and the granular component (GC), which perform different

267 functions in ribosome biogenesis [27]. We labeled the GC marker B23 with mEosEM-E and labeled

268 Nopp140, whose localization has been controversially reported to be at the FC or DFC [28, 29], with

269 mScarlet-H. The results showed that in the green channel, typical GC structures were clearly visible in

270 FM images after sLM, again exemplifying the utility of the subtraction strategy (Figure 4G-I). Merging

271 of green and red channels revealed that the red signal was encircled by the green signal (Figure 4J-L).

272 Further correlative FM and EM images (Figure 4M-O) showed that the fluorescence signal of Nopp140  
273 was closely matched to the solid high electron-dense regions (Figure 4N, arrowheads) in the EM image,  
274 indicating a DFC localization, which is consistent with the fact that it's a functional different area other  
275 than GC (Figure 4M, O). Additionally, we also double-labeled Nop52 and Nopp140 by mEosEM-E and  
276 mScarlet-H, respectively. Unexpectedly, while Nop52 was often used as a marker of GC [30], Nopp140  
277 was not located in the vacant holes devoid of the Nop52 signals, but partially overlapped with Nop52  
278 (Figure S9). These results indicated that Nop52 localized both at the GC and the DFC.

279

280 Taken together, these results strongly demonstrate that mEosEM-E and mScarlet-H are optimal probes  
281 for high-quality dual-color post-Epon-embedding CLEM imaging, and sCLEM with mEoEM-E offers a  
282 great advantage in reducing the green background of the Epon resin as well as in eliminating the signal  
283 crosstalk of RFPs.

284



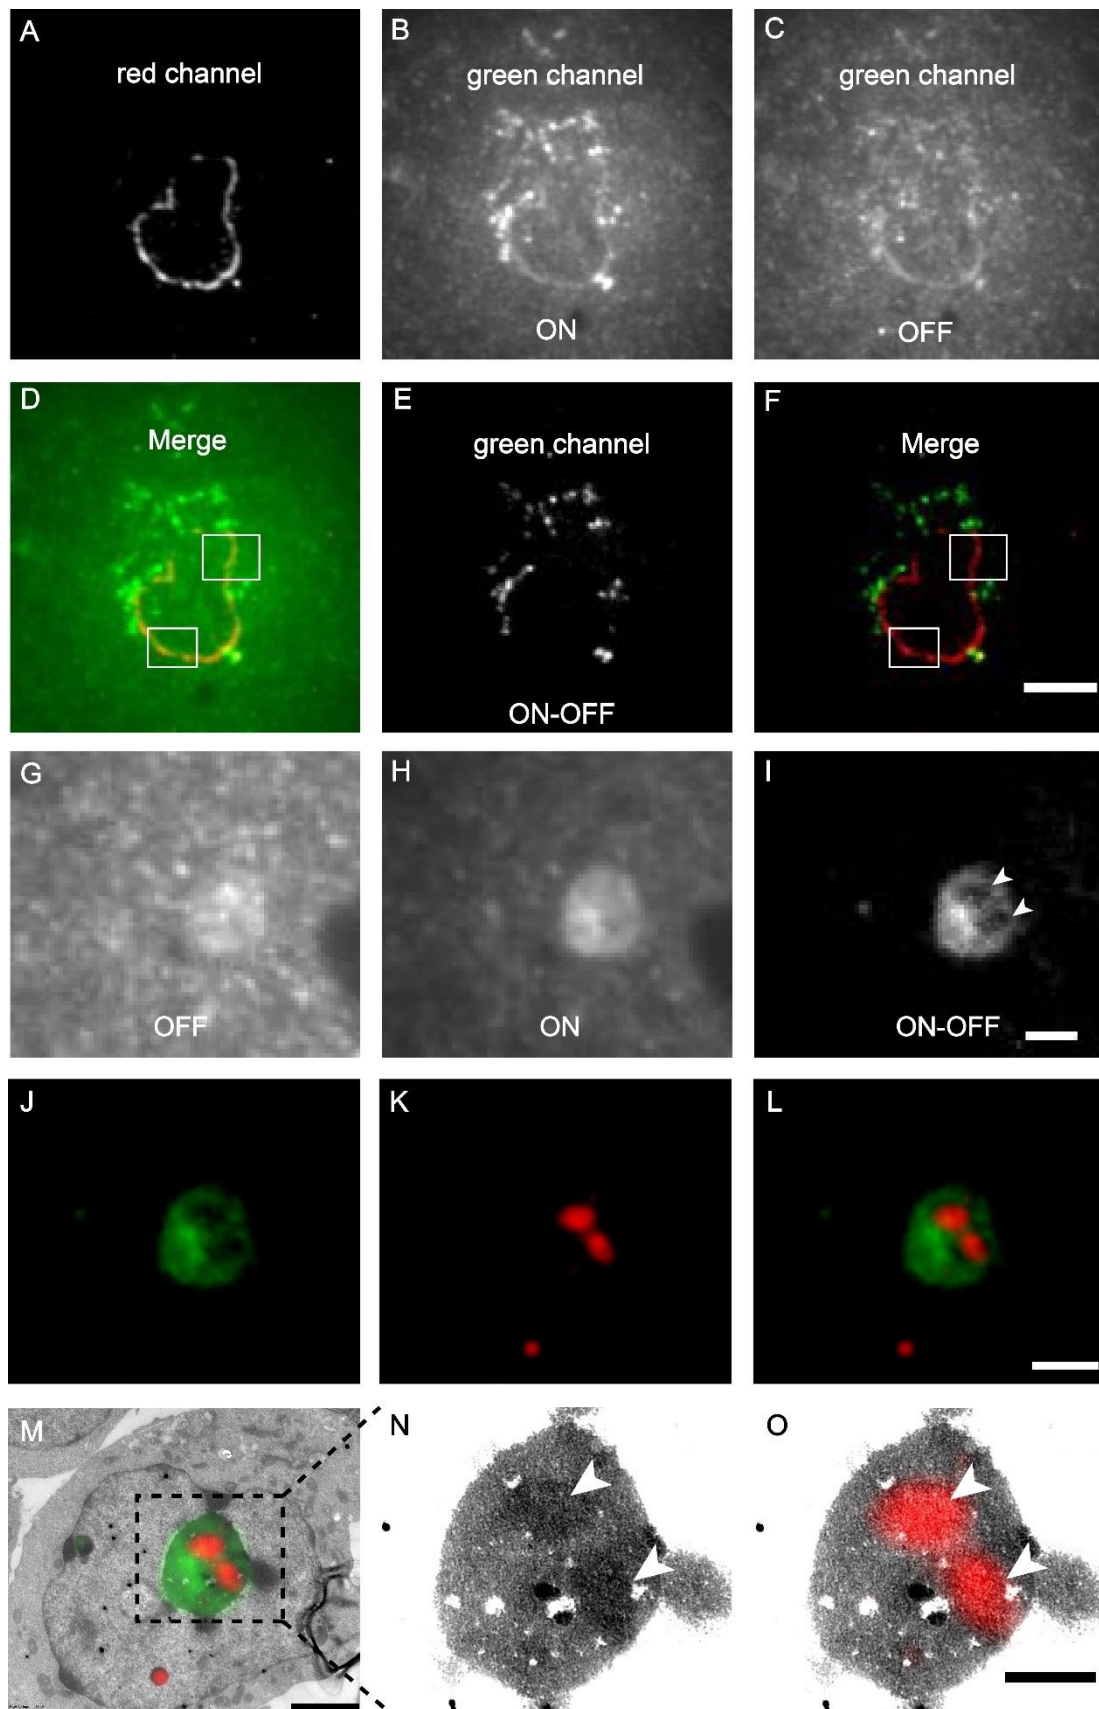

285

286

287

288

289

**Figure 4.** Dual-color post-Epon-embedding CLEM using mEosEM-E and mScarlet-H. (A-F) Dual-color imaging of mEosEM-E-labeled mitochondria and mScarlet-H-labeled LaminA protein in HEK 293T cell sections (100 nm). Representative red channel (A), green channel ON (B), and OFF (C) FM images. (D) Merged image of (A) and (B). White boxes indicate areas that showed crosstalk signals from mScarlet-

290 H. (E) Green channel ON – OFF image. (F) Merged image of (A) and (E). White boxes indicate the  
291 same areas in (D). Scale bar, 5  $\mu\text{m}$ . (G-O) Dual-color CLEM imaging of nucleolar proteins. OFF (G),  
292 ON (H), and ON – OFF (I) images of mEosEM-E labeled B23 in HEK 293T cells sections (100 nm).  
293 White arrowheads indicate areas that were not visible in (G) and (H). Scale bar, 2  $\mu\text{m}$ . Green channel  
294 FM (J), Red channel FM (K), merged channel FM (L), and CLEM (M) images of HEK 293T cell sections  
295 expressing mEosEM-E labeled B23 and mScarlet-H labeled Nopp140. Gamma value: 1.6 for both  
296 channels. Scale bars, 2  $\mu\text{m}$ . (N-O) Enlarged EM (N) and CLEM (O) images of boxed area in (M), white  
297 arrowheads indicate the localization of Nopp140 that showed higher EM contrast compared to B23.  
298 Gamma value: 1.6 for red channel. Scale bar, 1  $\mu\text{m}$ .  
299

## 300 Discussion

301 In CLEM imaging, there is always a trade-off between the performance of the FM and the EM. Thus, it  
302 is challenging to obtain good FM and EM images of the same ultrathin section at the same time.  
303 Developing CLEM probes with resistance to the treatment of EM sample preparation is an efficient way  
304 to solve this problem, thus, making CLEM with both high-quality FM and EM possible.  
305

306 Post-Epon-embedding CLEM was enabled by several FPs reported very recently, however, when these  
307 probes were used in practical CLEM imaging, the SBR of FM is very low. The problem is more  
308 prominent for imaging low-abundance proteins. In the current study, we utilized the optical switching  
309 properties of RSFPs and proposed an sCLEM method, by which the FP signal can be easily distinguished  
310 from that of the unmodulated background. sCLEM works more efficiently than the OLID technique in  
311 our case, which may be due to the phenomenon that the background fluorescence also showed minor on  
312 and off responses to 405- and 488-nm excitation. Compared to the single-frame subtraction (Max-Min),  
313 subtraction between the multi-frame averages of the on and off states ( $\text{Sum}_{\text{AVG}} - \text{Sum}_{\text{AVG}}$ ) has an  
314 additional benefit of largely attenuated noise. Notably, the sCLEM method hits two birds with one stone.  
315 In addition to effectively removing the background signal of the Epon resin and improving the SBR of  
316 the FM image, it also removes the signal crosstalk of the RFP in the green channel during dual-color  
317 CLEM. To further improve the SBR of FM image, we used mEosEM as the template and developed a  
318 variant mEosEM-E with enhanced on-state brightness and on/off contrast that is beneficial for fluorescent  
319 background elimination and weak signal extraction. We also identified mScarlet-H as the best RFP for  
320 post-Epon-embedding CLEM. This was validated by actual imaging applications, where we proved that  
321 mEosEM-E/mScarlet-H is an excellent FP pair for same-section dual-color CLEM of post-Epon-  
322 embedded samples. Compared with mEos4b, mEosEM retained higher fluorescence intensity after osmic  
323 acid treatment [16]. Considering that the fluorescence intensity retained in GMA-embedded samples is  
324 mainly dependent on the osmic acid-resistant properties of the FP, we suspected that mEosEM-  
325 E/mScarlet-H would also be excellent choices for the hydrophilic GMA resin.  
326

327 Besides the development of an advanced green CLEM probe, we also performed a meticulous study that  
328 thoroughly dissected the influence of key chemical treatments during TEM sample preparation on the  
329 fluorescence preservation of RFPs. Interestingly, we found that the responses of RFPs to these treatments  
330 vary greatly. Some RFPs (mRuby3, tdTomato) showed good  $\text{OsO}_4$  resistance, however, their superiorities  
331 diminished after complete EM sample preparation, suggesting that they are more sensitive to the  
332 subsequent sample treatments. Therefore, we reasoned that the  $\text{OsO}_4$  resistance assay is not a suitable  
333 gold standard for CLEM probe screening, even though  $\text{OsO}_4$  fixation seems to be the uppermost factor  
334 for fluorescence reduction. Development of an optimal probe requires investigation of the probe's final  
335 performance after complete sample preparation, even though this will significantly increase the workload  
336 of probe development, and add challenges for high-throughput screening. Furthermore, this study also  
337 provided useful information that may assist the rational design of new types of probes. For example,

338 mRuby3 exhibited superior robustness towards dehydration, which may provide clues for developing  
339 FPs that can work in a hydrophobic environment.

340

341 Before this study, nucleolar proteins have never been inspected by the same section CLEM. Our dual-  
342 color CLEM results revealed that although both have been considered as a GC marker, Nop52 and B23  
343 have different sub-nucleolar localizations. The partial co-localization of Nop52 with Nopp140 suggests  
344 that B23 would be a better marker to represent GC. Moreover, we confirmed a DFC localization of  
345 Nopp140 in our experimental conditions.

346

347 Further directions for the development of post-Epon-embedding CLEM probes would be: 1) the  
348 establishment of a high-throughput automatic on-section screening system; 2) a red RSFP CLEM probe  
349 for background-reduced and/or SR dual-color CLEM, for which mScarlet-H may be a good starting  
350 template; 3) both green and red CLEM probes with even higher on-section brightness, SBR, and  
351 photostability.

352

## 353 **Materials and methods**

### 354 *Development of mEosEM-E*

355 Saturation mutagenesis of mEosEM at His63 was performed in the pEGFP-N1-mito-mEosEM plasmid  
356 with Q5 high fidelity polymerase (New England Biolabs). The amplified fragments containing  
357 homologous arms and mutation sites were transformed into the Top10 competent cells (Tsingke) and  
358 sequenced (Tsingke). HEK 293T cells were transfected with sequencing validated mutants and were  
359 prepared following the standard EM sample preparation procedure. Cell slices with a thickness of 100  
360 nm were imaged under a homemade wide field fluorescence microscope (Olympus IX71 body and  
361 Olympus PLAN APO 100×, 1.49 NA oil objective) to characterize the photoswitching properties of  
362 different mutants. mEosEM-E was identified for its highest photoswitching contrast ratio.

363

### 364 *Plasmid construction*

365 For prokaryotic expression plasmids pRsetA-RFPs (mScarlet, mScarlet-I, mScarlet-H, mKate2,  
366 FusionRed-MQV, mCherry2, mRuby3, mApple, tdTomato), RFPs fragments were PCR amplified and  
367 digested with BamHI and EcoRI restriction enzymes. Then fragments were ligated into the pRsetA vector  
368 digested with the same enzymes. For eukaryotic expression plasmids, pmEosEM-N1-mito was digested  
369 with AgeI and NotI restriction enzymes to replace mEosEM with mEosEM-E or RFPs fragments with  
370 the same restriction enzyme sticky ends. pEGFP-C1-Sec61, pmEos3.2-N1-H2B, and pmEosEM -C1-  
371 LaminA plasmids were digested with AgeI/BglII, XhoI/NotI, and NheI/BglII restriction enzymes  
372 respectively to replace EGFP, mEos3.2 and mEosEM with Scarlett-H fragment. For the construction of  
373 pmEosEM-C1-B23, pmEosEM-C1-Nop52, and pmScarlet-H-C1-Nopp140 plasmids, the full-length  
374 cDNA of B23, Nop52 and Nopp140 were PCR amplified from the HEK 293T cDNA library, digested  
375 with EcoRI/SalI, HindIII/SalI, and BglII/SalI restriction enzymes and inserted into pEGFP-C1-  
376 mEosEM-LaminA and pEGFP-C1-mScarlet-H-LaminA plasmids to replace LaminA. Q5 polymerase  
377 and T4 ligase were purchased from New England Biolabs. All restriction enzymes were purchased from  
378 Thermo Fisher Scientific.

379

### 380 *Cell culture and transfection*

381 HEK 293T and U-2 OS cells were cultured in Dulbecco's Modified Eagle Medium (Gibco) and McCoy's  
382 5A Modified Medium (Gibco), respectively, supplemented with 10% FBS (Gibco) and 1% penicillin-  
383 streptomycin (TransGene Biotech). Cells were maintained at 37°C in an incubator supplied with 5% CO<sub>2</sub>  
384 (vol/vol). Transfections were performed with purified plasmids using lipofectamine 2000 (Invitrogen)

385 (with a ratio of 1 µg DNA: 3 µl lipofectamine) in 6 cm pertri dishes or 12-well cell culture plates  
386 following the manufacturer's instructions.

387

#### 388 *EM sample preparation*

389 Successfully transfected cells were trypsinized and then harvested by centrifugation. Cells were fixed  
390 with 2% paraformaldehyde (Electron Microscopy Sciences) and 2.5% glutaraldehyde (Electron  
391 Microscopy Sciences) in 100 mM PBS at 4°C overnight. Pre-fixed cells were washed 2 times with PBS  
392 buffer and 2 times with Milli-Q water on ice. Then post-fixation with 1% OsO<sub>4</sub> was performed on ice for  
393 1 h. After 4 washes with Milli-Q water, cells were gradually dehydrated with a series of concentration  
394 gradients of ethanol (30% 50% 70% 90% 100%) for 6 min each and followed by dehydration with 100%  
395 acetone for 6 min. Cells were then infiltrated step by step in mixtures of Epon (50% Epon812, 30.5%  
396 NMA, 18% DDSA, 1.5% DMP-30) and acetone with gradient concentrations (50% Epon for 2 h, 75%  
397 Epon for 3 h, 100% Epon for 12 h, 100% Epon for 12 h). Finally, cells were embedded in 100% Epon at  
398 60°C for 16 h and then sectioned into 100-nm slices for subsequent experiments.

399

#### 400 *Photoswitching property analysis*

401 HEK 293T cells expressing mitochondria targeted mEosEM and mutants were used for photoswitching  
402 property analysis. For the analysis before EM sample preparation, cells were excited by continuous 488-  
403 nm laser (0.41 kW/cm<sup>2</sup>), while every 10 s, a 405-nm laser (0.21 kW/cm<sup>2</sup>) pulse of 0.1 s were added to  
404 turn on the FPs. Six cycles were recorded for all FPs. For analysis after EM sample preparation, 100-nm  
405 cell sections were imaged under a continuous 488-nm laser for 50 frames, after which the 405-nm laser  
406 was added for 1 s to record the fluorescence signal of the FPs at the on-state. The contrast ratio was  
407 calculated as follow:

408

$$\text{Contrast ratio} = (\text{Max}-\text{Mean})/\text{Mean}$$

409 Max represents the maximum value of the signal in all acquired images, Mean represents the averaged  
410 signal value of the first 20 frames acquired before the application of 405-nm laser.

411

#### 412 *High-content analysis of pre-fixation, post-fixation, and dehydration resistance of RFPs*

413 U-2 OS cells expressing pRFPs-mito were seeded into 96-well optical polymer base microplates and  
414 fixed with 2% paraformaldehyde (Electron Microscopy Sciences) and 2.5% glutaraldehyde (Electron  
415 Microscopy Sciences) in 100 mM PBS at 37°C for 15min. The pre-fixed cells were washed 4 times with  
416 PBS and then post fixed with 1% OsO<sub>4</sub>. After 10 min incubation at 4°C, OsO<sub>4</sub> was removed and cells  
417 were washed 5 times with PBS and stored in PBS. For dehydration, PBS buffer was replaced with  
418 absolute ethanol for 20 min without washing. Fluorescence images were acquired by the Opera Phenix™  
419 High Content Screening System (PerkinElmer) using a 20×, 0.4 NA water objective with an excitation  
420 laser of 568 nm. Data quantification and analysis were performed using Harmony 4.9 software  
421 (PerkinElmer).

422

#### 423 *Protein purification and thermostability measurement*

424 BL21(DE3) competent cells (Tsingke) were transformed with prokaryotic expression plasmids pRsetA-  
425 RFPs and single clones were cultured in liquid LB medium to the logarithmic growth phase. Then 0.8  
426 mM IPTG (Isopropyl β- d-1-thiogalactopyranoside) was added to induce the expression of RFPs. After  
427 induction at 16 °C for 24 h, cells were harvested by centrifugation. The pelleted bacteria were  
428 resuspended in binding buffer including 10 mM imidazole and lysed by ultrasonication. Protein was  
429 purified through affinity chromatography (Ni-NTA His-Bind resin, Qiagen), followed by gel filtration  
430 chromatography (Superdex 200 Increase 10/300 GL, GE Healthcare). Purified protein was diluted in  
431 PBS buffer (pH = 7.2) and the fluorescence intensity was recorded at 60 °C in the Rotor-Gene 6600 real-

432 time PCR cycler (Qiagen) for 18 h. The thermostability was defined as the ratio between the initial and  
433 the final fluorescence intensities.

434

#### 435 *Photostability measurement*

436 HEK 293T cell samples expressing mitochondria targeted RFPs were prepared as described above for  
437 EM and sectioned into 100 nm slices. Sample slices were illuminated with a 561-nm laser and the  
438 fluorescence signal was acquired by time-lapse imaging. Photostability was defined as the time when  
439 fluorescence intensity reached 1/e of its initial.

440

#### 441 *CLEM imaging*

442 Cleaning and coating of the coverslips with pioloform (Ted Pella) were processed as previously reported  
443 [31]. Sectioned slices were placed on well prepared coverslips and submerged with mowiol buffer to  
444 recover the fluorescence. After a 30 min incubation, slices were imaged using a widefield fluorescence  
445 microscope (Olympus IX71) equipped with a 100×, 1.49 NA oil objective (Olympus PLAN APO).  
446 Images were acquired using an electron-multiplying charge-coupled device (EMCCD) camera (Andor  
447 iXon DV-897 BV). For the red channel, 100 frames were acquired for averaging during excitation by a  
448 561-nm laser. For the green channel, 20 frames were first acquired using 488-nm laser excitation alone,  
449 then another 20 frames were acquired while a 405-nm laser pulse of 1 s was added to switch on the  
450 mEosEM-E molecules. For both channels, the exposure time was 50 ms. After fluorescence signal  
451 recording, DIC images of 100×, 16×, and 10× magnifications were sequentially collected to assist the  
452 target retrieving during subsequent EM imaging. After LM imaging, a rectangle on the pioloform film  
453 with a slice on it was scored by a knife. 12% hydrofluoric acid was dropped on the periphery of the  
454 rectangle to detach the pioloform film from the glass coverslip. When the coverslip was submerged under  
455 water, the detached pioloform film would float on the surface and was captured by an uncoated slot grid.  
456 Next, the section slice was stained with 2% UA and 1% Sato's triple lead. Finally, the sample was imaged  
457 under TECNAI SPIRIT TEM (FEI). Gold nanoparticles were used as the fiducial marker. FM and EM  
458 images were correlated by eC-CLEM following the previous protocol [16].

459

#### 460 *Registration of green and red channel FM images*

461 TetraSpeck™ Microspheres (Thermofisher Scientific) were diluted in PBS buffer and spotted on a  
462 coverslip (Fisher Scientific). Dual-color fluorescence signals were recorded simultaneously under 488-  
463 and 561-nm lasers. The registration was performed with the Fiji plugin "Multi Registration" in ImageJ.

464

#### 465 **Funding**

466 The project was funded by National Key Research and Development Program of China  
467 (2017YFA0505300); National Natural Science Foundation of China (32027901, 31870857, 21778069,  
468 21927813); The Strategic Priority Research Program of Chinese Academy of Sciences (XDB37040301).

469

#### 470 **Acknowledgments**

471 We are grateful to Ya Wang from Research Platform for Protein Sciences at Institute of Biophysics for  
472 her support of Opera Phenix™ High Content Screening system data analysis. We thank Center for  
473 Biological Imaging at Institute of Biophysics for EM imaging support.

474

#### 475 **Author contributions**

476 P.X., M.Z., D.P., and N.L. designed the experiments. D.P., N.L., and W.H. performed the experiments.  
477 P.X., M.Z., D.P., and N.L. analyzed the data. P.X., M.Z., and T.X. supervised the project and wrote the  
478 manuscript. K.D. provided guidance on the project.

479

#### 480 **Conflict of interest**

481 The authors declare that they have no conflict of interest.

482

#### 483 **References**

- 484 1. Wells, B. and L.L. Cour, *A technique for studying one and the same section of a cell in sequence*  
485 *with the light and electron microscope*. Journal of microscopy, 1971. **93**(1): p. 43-48.
- 486 2. Hoffman, D.P., et al., *Correlative three-dimensional super-resolution and block-face electron*  
487 *microscopy of whole vitreously frozen cells*. Science, 2020. **367**(6475).
- 488 3. Bykov, Y.S., et al., *Correlative light and electron microscopy methods for the study of virus–cell*  
489 *interactions*. FEBS letters, 2016. **590**(13): p. 1877-1895.
- 490 4. Fang, T., et al., *Nanobody immunostaining for correlated light and electron microscopy with*  
491 *preservation of ultrastructure*. Nature methods, 2018. **15**(12): p. 1029-1032.
- 492 5. Rae, J., et al., *A robust method for particulate detection of a genetic tag for 3D electron*  
493 *microscopy*. Elife, 2021. **10**: p. e64630.
- 494 6. Lam, S.S., et al., *Directed evolution of APEX2 for electron microscopy and proximity labeling*.  
495 Nature methods, 2015. **12**(1): p. 51-54.
- 496 7. Shu, X., et al., *A genetically encoded tag for correlated light and electron microscopy of intact*  
497 *cells, tissues, and organisms*. PLoS biology, 2011. **9**(4): p. e1001041.
- 498 8. Risco, C., et al., *Specific, sensitive, high-resolution detection of protein molecules in eukaryotic*  
499 *cells using metal-tagging transmission electron microscopy*. Structure, 2012. **20**(5): p. 759-766.
- 500 9. Tabata, S., et al., *Electron Microscopic Detection of Single Membrane Proteins by a Specific*  
501 *Chemical Labeling*. Iscience, 2019. **22**: p. 256-268.
- 502 10. Polishchuk, R.S., E.V. Polishchuk, and A. Luini, *Visualizing live dynamics and ultrastructure of*  
503 *intracellular organelles with preembedding correlative light-electron microscopy*. Methods in  
504 cell biology, 2012. **111**: p. 21-35.
- 505 11. Polishchuk, R.S., et al., *Correlative light-electron microscopy reveals the tubular-saccular*  
506 *ultrastructure of carriers operating between Golgi apparatus and plasma membrane*. The  
507 Journal of cell biology, 2000. **148**(1): p. 45-58.
- 508 12. Kukulski, W., et al., *Correlated fluorescence and 3D electron microscopy with high sensitivity*  
509 *and spatial precision*. Journal of Cell Biology, 2011. **192**(1): p. 111-119.
- 510 13. Watanabe, S., et al., *Protein localization in electron micrographs using fluorescence nanoscopy*.  
511 Nature methods, 2011. **8**(1): p. 80-84.
- 512 14. Paez-Segala, M.G., et al., *Fixation-resistant photoactivatable fluorescent proteins for CLEM*.  
513 Nature methods, 2015. **12**(3): p. 215-218.
- 514 15. Luft, J.H., *Improvements in epoxy resin embedding methods*. The Journal of biophysical and  
515 biochemical cytology, 1961. **9**(2): p. 409-414.
- 516 16. Fu, Z., et al., *mEosEM withstands osmium staining and Epon embedding for super-resolution*  
517 *CLEM*. Nature methods, 2020. **17**(1): p. 55-58.
- 518 17. Tanida, I., et al., *Visualization of cytoplasmic organelles via in-resin CLEM using an osmium-*

- 519            *resistant far-red protein*. Scientific reports, 2020. **10**(1): p. 1-7.
- 520    18.    Tanida, I., et al., *Two-color in-resin CLEM of Epon-embedded cells using osmium resistant green*  
521            *and red fluorescent proteins*. Scientific reports, 2020. **10**(1): p. 1-8.
- 522    19.    Marriott, G., et al., *Optical lock-in detection imaging microscopy for contrast-enhanced imaging*  
523            *in living cells*. Proceedings of the National Academy of Sciences, 2008. **105**(46): p. 17789-17794.
- 524    20.    Chen, Y.-C., et al., *Optically modulated photoswitchable fluorescent proteins yield improved*  
525            *biological imaging sensitivity*. Journal of the American Chemical Society, 2015. **137**(40): p.  
526            12764-12767.
- 527    21.    Chen, Y.-C., et al., *Facile autofluorescence suppression enabling tracking of single viruses in live*  
528            *cells*. Journal of Biological Chemistry, 2019. **294**(50): p. 19111-19118.
- 529    22.    Querard, J., et al., *Photoswitching Kinetics and Phase - Sensitive Detection Add Discriminative*  
530            *Dimensions for Selective Fluorescence Imaging*. Angewandte Chemie International Edition,  
531            2015. **54**(9): p. 2633-2637.
- 532    23.    Chang, H., et al., *A unique series of reversibly switchable fluorescent proteins with beneficial*  
533            *properties for various applications*. Proceedings of the National Academy of Sciences, 2012.  
534            **109**(12): p. 4455-4460.
- 535    24.    Helmerich, D.A., et al., *Photoblueing of organic dyes can cause artifacts in super-resolution*  
536            *microscopy*. Nature Methods, 2021. **18**(3): p. 253-257.
- 537    25.    Kremers, G.-J., et al., *Photoconversion in orange and red fluorescent proteins*. Nature methods,  
538            2009. **6**(5): p. 355-358.
- 539    26.    Protasova, E.A., et al., *Chromophore reduction plus reversible photobleaching: how the mKate2*  
540            *“photoconversion” works*. Photochemical & Photobiological Sciences, 2021: p. 1-13.
- 541    27.    Farley, K.I., et al., *Determinants of mammalian nucleolar architecture*. Chromosoma, 2015.  
542            **124**(3): p. 323-331.
- 543    28.    Chen, H.-K., et al., *Human Nopp140, which interacts with RNA polymerase I: implications for*  
544            *rRNA gene transcription and nucleolar structural organization*. Molecular and cellular biology,  
545            1999. **19**(12): p. 8536-8546.
- 546    29.    Okuwaki, M., *The structure and functions of NPM1/Nucleophsmin/B23, a multifunctional*  
547            *nucleolar acidic protein*. Journal of biochemistry, 2008. **143**(4): p. 441-448.
- 548    30.    Hernandez-Verdun, D., *Nucleolus: from structure to dynamics*. Histochemistry and cell biology,  
549            2006. **125**(1): p. 127-137.
- 550    31.    Xu, P., et al., *A protocol for Epon-embedding-based correlative super-resolution light and*  
551            *electron microscopy*. 2019.
- 552
- 553

554 **Supplementary Materials**

|                  |                                                                                                                |
|------------------|----------------------------------------------------------------------------------------------------------------|
| <b>Figure S1</b> | Autofluorescence of Epon resin slice                                                                           |
| <b>Figure S2</b> | Photoswitching properties of mEosEM and mutants before EM sample preparation                                   |
| <b>Figure S3</b> | Scheme of sLM imaging of EM sample                                                                             |
| <b>Figure S4</b> | SBR comparison of mEosEM and mEosEM-E in OFF- and ON-images                                                    |
| <b>Figure S5</b> | Pre-fixation influence on RFPs                                                                                 |
| <b>Figure S6</b> | Fluorescence intensity of RFPs in pre-fixed cells followed by dehydration                                      |
| <b>Figure S7</b> | SBR comparison of RFPs after EM sample preparation                                                             |
| <b>Figure S8</b> | Green fluorescence emission properties of RFPs                                                                 |
| <b>Figure S9</b> | Dual-color post-Epon-embedding CLEM imaging of Nopp52 and Nopp140                                              |
| <b>Table S1</b>  | Statistics for contrast ratio comparison between mEosEM and mEosEM-E                                           |
| <b>Table S2</b>  | Statistics for SBR of mEosEM in OFF, ON, and ON – OFF images                                                   |
| <b>Table S3</b>  | Statistics for SBR of mEosEM-E in OFF, ON, and ON – OFF images                                                 |
| <b>Table S4</b>  | Statistics for SBR comparison between mEosEM and mEosEM-E in ON – OFF images                                   |
| <b>Table S5</b>  | Statistics for fluorescence intensity comparison of RFPs after 1% OsO4 post-fixation                           |
| <b>Table S6</b>  | Statistics for fluorescence intensity comparison of RFPs after 1% OsO4 post-fixation and dehydration treatment |
| <b>Table S7</b>  | Statistics for thermostability comparison of RFPs                                                              |
| <b>Table S8</b>  | Statistics for fluorescence intensity comparison of RFPs after EM sample preparation                           |
| <b>Table S9</b>  | Statistics for photostability comparison of RFPs                                                               |
| <b>Table S10</b> | Statistics for SBR comparison between mEosEM and mEosEM-E in OFF images                                        |
| <b>Table S11</b> | Statistics for SBR comparison between mEosEM and mEosEM-E in ON images                                         |
| <b>Table S12</b> | Statistics for fluorescence intensity comparison of RFPs in live cells                                         |
| <b>Table S13</b> | Statistics for fluorescence intensity comparison of RFPs after pre-fixation                                    |
| <b>Table S14</b> | Statistics for fluorescence intensity comparison of RFPs after dehydration treatment                           |
| <b>Table S15</b> | Statistics for SBR comparison of RFPs after EM sample preparation                                              |



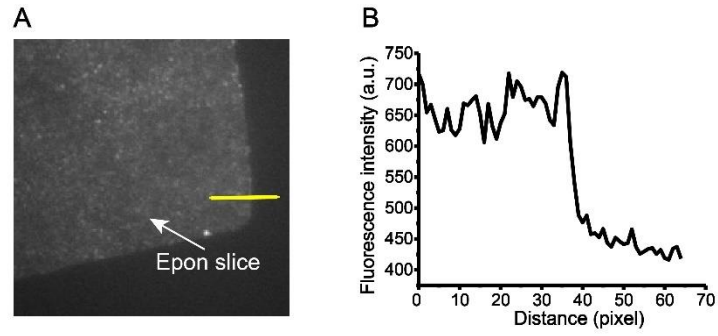

556

557 **Figure S1.** Autofluorescence of Epon resin slice. (A) A corner of Epon slice was imaged under 488-nm  
558 laser ( $0.41 \text{ kW/cm}^2$ ). (B) Fluorescence intensity profile of the yellow line in (A). Fluorescence intensity  
559 was plotted against distance.

560

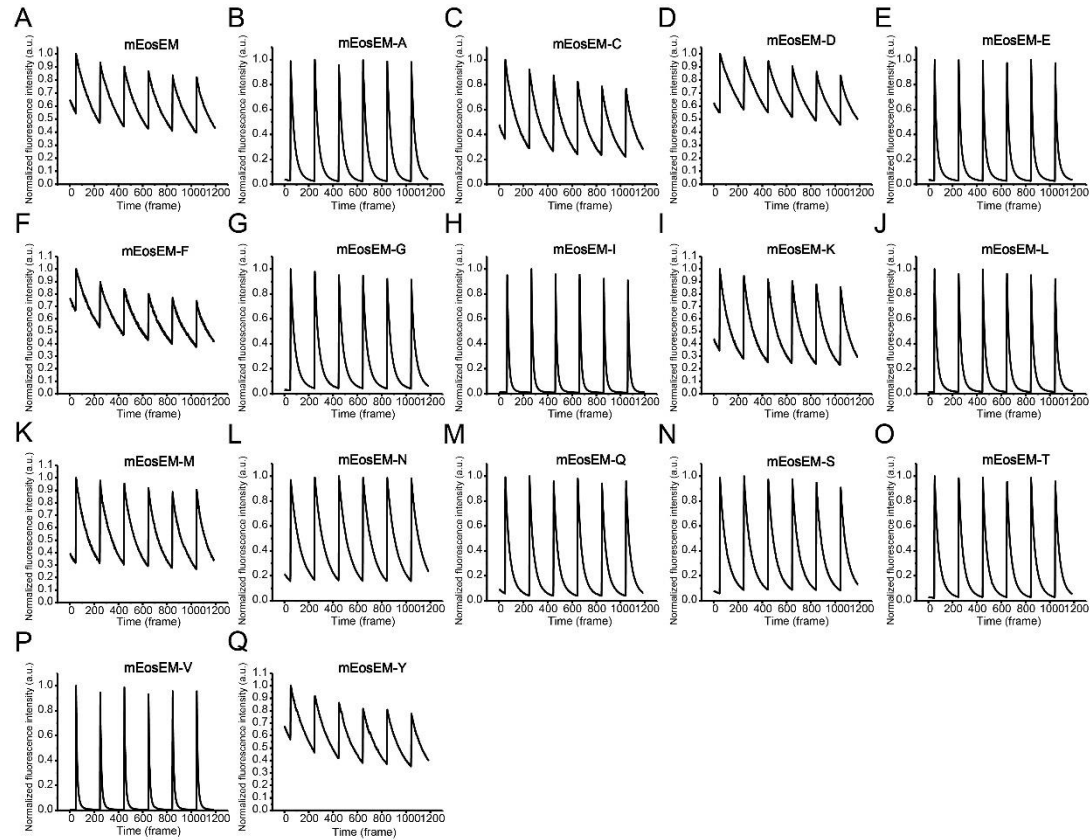

561

562 **Figure S2.** Photoswitching properties of mEosEM and mutants before EM sample preparation. (A-Q)  
563 Normalized fluorescence intensity of mEosEM and mutants was plotted against time. Cells expressing  
564 different fluorescent proteins were continuously illuminated with a 488-nm laser (8 W/cm<sup>2</sup>), while every  
565 10 s, a 405-nm laser pulse (0.1 s, 9 W/cm<sup>2</sup>) were applied to switch on the FPs. Exposure time, 50 ms.  
566

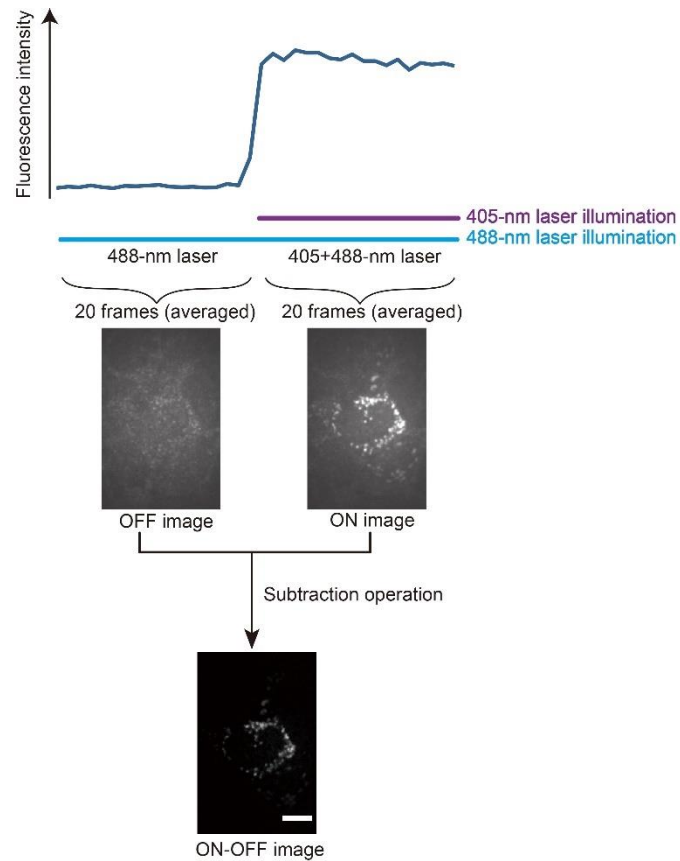

567

568 **Figure S3.** Scheme of sLM imaging of EM sample. 100-nm cell sections were imaged under a continuous  
569 488-nm laser for 50 frames, after which the 405-nm laser was added for 20 frames to record the  
570 fluorescence signal of the FPs at the on-state. The 20 frames immediately before 405-nm illumination  
571 were averaged to produce OFF images, and the subsequent 20 frames with 405-nm illumination were  
572 averaged to produce ON images. The sLM images (ON – OFF images) were generated by pixel-by-pixel  
573 subtraction using adjacent ON and OFF images. Scale bar, 5 $\mu$ m.

574

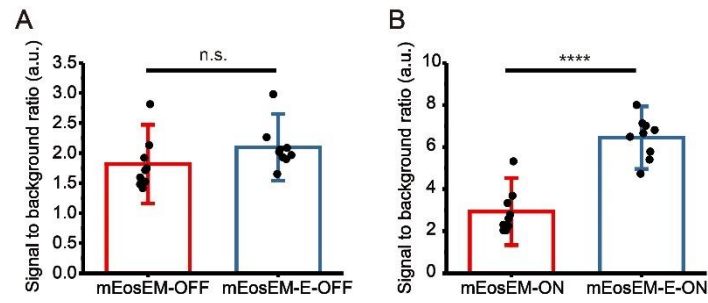

575

576 **Figure S4.** SBR comparison of mEosEM and mEosEM-E in OFF- and ON-images. **(A)** Statistics of SBR  
577 in OFF-images between mEosEM and mEosEM-E. **(B)** Statistics of SBR in ON-images between  
578 mEosEM and mEosEM-E. Bars represent mean  $\pm$  SD. P-value were determined with two-tailed t-test in  
579 **(A-B)** (n = 9). n.s. indicates  $p > 0.05$ , \*\*\*\* indicates  $p < 0.0001$ . Data are summarized in Table S10 & 11.

580

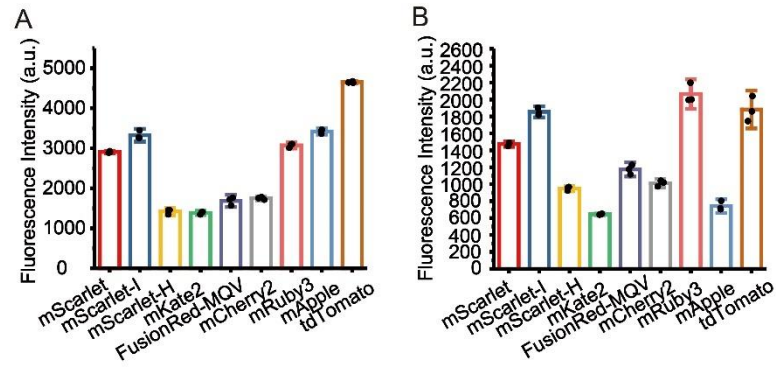

581

582 **Figure S5.** Pre-fixation influence on RFPs. (A) Fluorescence intensity of RFPs in live cells. Cells  
583 expressing RFPs were seeded in 96-well plates and imaged. (B) Fluorescence intensity of RFPs in pre-  
584 fixed cells. Cells expressing RFPs were seeded in 96-well plates and treated with fixation buffer (2.5%  
585 Glutaraldehyde and 2% Paraformaldehyde in PBS) for 15 min then washed 3 times with PBS buffer.  
586 Data were recorded using a high-content screening system. Excitation wavelength, 561 nm. Exposure  
587 time, 40 ms. Bars represent mean  $\pm$  SD (n = 3). Data are summarized in Table S12 & 13.

588

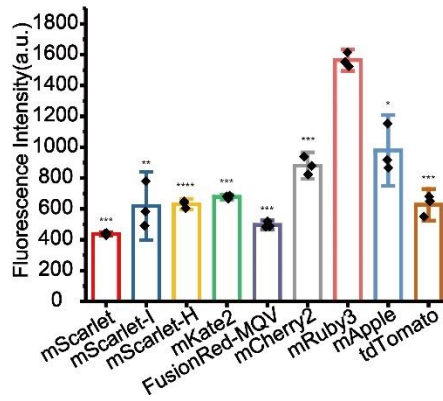

589

590 **Figure S6.** Fluorescence intensity of RFPs in pre-fixed cells followed by dehydration. Cells expressing  
591 RFPs were seeded in 96-well plates and fixed with fixation buffer (2.5% Glutaraldehyde and 2%  
592 Paraformaldehyde in PBS buffer) for 15 min, and then treated with absolute ethanol for 20 min. Data  
593 were recorded using a high-content screening system. Excitation wavelength, 561 nm. Exposure time,  
594 40 ms. Bars represent mean  $\pm$  SD. P-value were determined with two-tailed t-tests ( $n = 3$ ). \* indicates  
595  $p < 0.05$ . \*\* indicates  $p < 0.01$ . \*\*\* indicates  $p < 0.001$ . \*\*\*\* indicates  $p < 0.0001$ . Data are summarized in  
596 Table S14.

597

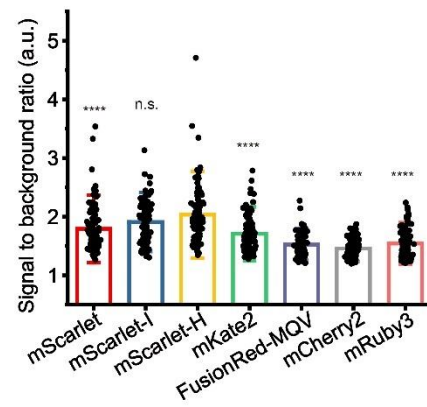

598

599 **Figure S7.** SBR comparison of RFPs after EM sample preparation. HEK 293T cells expressing RFPs  
600 were prepared under standard EM sample preparation and sectioned into 100 nm slices. Mann-Whitney  
601 U test was performed (n = 106). n.s. indicates  $p > 0.05$ , \*\*\*\* indicates  $p < 0.0001$ . Data are summarized  
602 in Table S15.

603

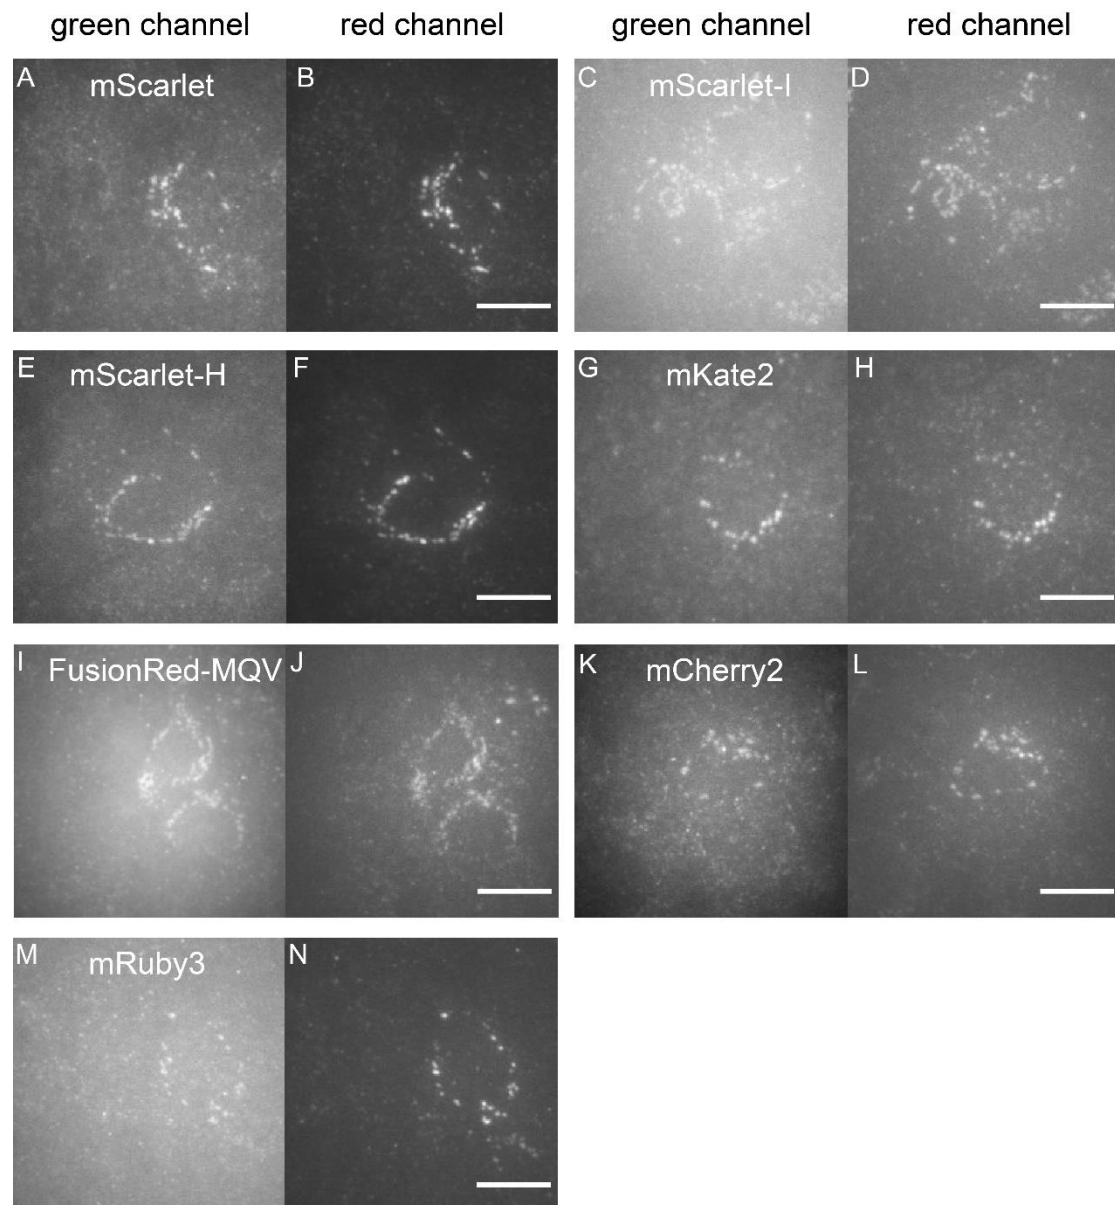

604

605 **Figure S8.** Green fluorescence emission properties of RFPs. HEK 293T cells expressing RFPs were  
606 prepared under standard EM sample preparation and sectioned into 100 nm slices. Sample slices were  
607 imaged by wide field fluorescence microscopy with sequential illumination of 561- and 488-nm laser.  
608 (A), (C), (E), (G), (I), (K) and (M) Slices were illuminated under 488-nm laser (0.92 kW/cm<sup>2</sup>) and  
609 signals were recorded from the green channel. (B), (D), (F), (H), (J), (L) and (N) Slices were illuminated  
610 under 561-nm laser (0.57 kW/cm<sup>2</sup>) and signals were recorded from the red channel. Scale bars, 10 μm.

611

612

613



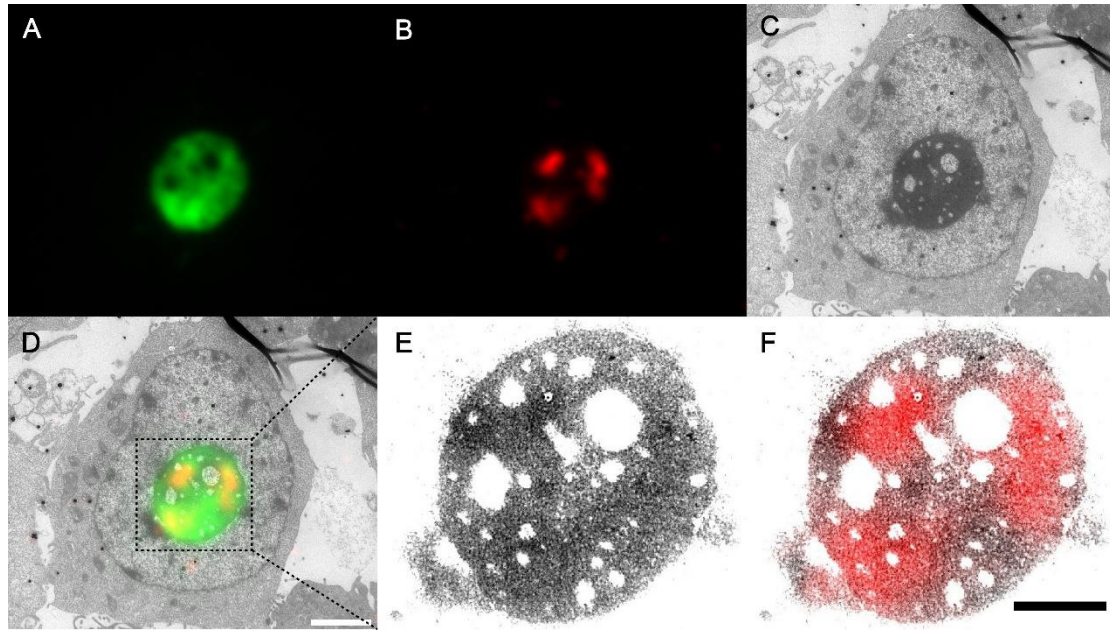

614

615 **Figure S9.** Dual-color post-Epon-embedding CLEM imaging of Nopp52 and Nopp140. (A-D) Dual-  
616 color CLEM imaging of mEosEM-E labeled Nopp52 and mScarlet-H labeled Nopp140 protein in HEK  
617 293T cell sections (100 nm). Green channel FM (A), red channel FM (B), EM (C), and CLEM (D)  
618 images. Scale bar, 2  $\mu\text{m}$ . (E-F) Enlarged EM (E) and red channel CLEM (F) images of boxed area in  
619 (D). Gamma value: 1.6 for both channels. Scale bar, 1  $\mu\text{m}$ .

620

|                | mEosEM   | mEosEM-E |
|----------------|----------|----------|
| Contrast Ratio | 2.147    | 4.660    |
|                | 2.513    | 7.366    |
|                | 2.216    | 7.561    |
|                | 2.256    | 7.351    |
|                | 2.132    | 4.959    |
|                | 2.233    | 4.190    |
|                | 2.404    | 4.832    |
|                | 2.289    | 6.791    |
|                | 1.597    | 6.082    |
| mean           | 2.199    | 5.977    |
| s.d.           | 0.256    | 1.336    |
| P value        | 2.13E-05 |          |

621 **Table S1.** Statistics for contrast ratio comparison between mEosEM and mEosEM-E. Two-tailed t-test

622 was performed between mEosEM and mEosEM-E, n = 9.

623



|                            | mEosEM (OFF) | mEosEM (ON) | mEosEM (ON-OFF) |
|----------------------------|--------------|-------------|-----------------|
| Signal-to-Background Ratio | 2.130        | 3.684       | 12.289          |
|                            | 2.812        | 5.321       | 12.680          |
|                            | 1.921        | 3.336       | 11.894          |
|                            | 1.716        | 2.604       | 6.375           |
|                            | 1.416        | 2.035       | 5.226           |
|                            | 1.746        | 2.792       | 9.019           |
|                            | 1.478        | 2.304       | 9.097           |
|                            | 1.524        | 2.251       | 6.370           |
|                            | 1.593        | 2.039       | 3.676           |
| mean                       | 1.815        | 2.930       | 8.514           |
| s.d.                       | 0.437        | 1.062       | 3.298           |
| P value                    |              |             | 0.000762        |

625 **Table S2.** Statistics for SBR of mEosEM in OFF, ON, and ON – OFF images. Two-tailed t-test was  
626 performed between mEosEM (ON) and mEosEM (ON – OFF), n = 9.

627

|                            | mEosEM-E<br>(OFF) | mEosEM-E (ON) | mEosEM-E<br>(ON-OFF) |
|----------------------------|-------------------|---------------|----------------------|
| Signal-to-Background Ratio | 2.086             | 5.785         | 28.925               |
|                            | 1.651             | 4.731         | 16.408               |
|                            | 1.931             | 7.015         | 34.881               |
|                            | 2.020             | 7.132         | 27.124               |
|                            | 1.899             | 5.406         | 38.488               |
|                            | 2.978             | 8.000         | 22.849               |
|                            | 2.263             | 6.488         | 28.004               |
|                            | 1.966             | 6.808         | 37.050               |
|                            | 2.061             | 6.655         | 31.652               |
| mean                       | 2.095             | 6.447         | 29.487               |
| s.d.                       | 0.370             | 0.990         | 7.029                |
| P value                    |                   |               | 7.87E-06             |

628 **Table S3.** Statistics for SBR of mEosEM-E in OFF, ON, and ON – OFF images. Two-tailed t-test was  
629 performed between mEosEM-E (ON) and mEosEM-E (ON – OFF), n = 9.  
630

|                            | mEosEM   | mEosEM-E |
|----------------------------|----------|----------|
| Signal-to-Background Ratio | 12.289   | 28.925   |
|                            | 12.680   | 16.408   |
|                            | 11.894   | 34.881   |
|                            | 6.375    | 27.124   |
|                            | 5.226    | 38.488   |
|                            | 9.019    | 22.849   |
|                            | 9.097    | 28.004   |
|                            | 6.370    | 37.050   |
|                            | 3.676    | 31.652   |
| mean                       | 8.514    | 29.487   |
| s.d.                       | 3.298    | 7.029    |
| P value                    | 4.70E-06 |          |

631 **Table S4.** Statistics for SBR comparison between mEosEM and mEosEM-E in ON — OFF images. Two-  
632 tailed t-test was performed between mEosEM and mEosEM-E, n = 9.  
633

634

|              | mScarlet | mScarlet-I | mScarlet-H | mKate2  | FusionRed-MQV | mCherry2 | mRuby3   | mApple  | tdTomato |
|--------------|----------|------------|------------|---------|---------------|----------|----------|---------|----------|
| Fluorescence |          |            |            |         |               |          |          |         |          |
| Intensity    | 741.800  | 791.900    | 609.200    | 322.500 | 445.800       | 552.600  | 743.900  | 311.400 | 482.700  |
|              | 712.100  | 764.000    | 592.400    | 320.800 | 440.100       | 505.400  | 738.000  | 304.400 | 495.900  |
|              | 724.400  | 833.300    | 625.800    | 330.300 | 438.100       | 519.300  | 776.600  | 310.600 | 477.000  |
| Mean         | 726.100  | 796.400    | 609.133    | 324.533 | 441.333       | 525.767  | 752.833  | 308.800 | 485.200  |
| s.d.         | 14.923   | 34.868     | 16.700     | 5.066   | 3.995         | 24.255   | 20.793   | 3.831   | 9.695    |
| P value      |          |            |            |         |               |          |          |         |          |
| (compared to |          |            |            |         |               |          |          |         |          |
| mKate2)      | 0.000127 | 0.00150    | 0.000478   |         |               |          | 0.000423 |         |          |
| P value      |          |            |            |         |               |          |          |         |          |
| (compared to |          |            |            |         |               |          |          |         |          |
| mCherry2)    | 0.000714 | 0.000695   | 0.0108     |         |               |          | 0.000286 |         |          |

635 **Table S5.** Statistics for fluorescence intensity comparison of RFPs after 1% OsO<sub>4</sub> post-fixation. Two-  
636 tailed t-tests were performed between mKate2 and mScarlet, mScarlet-I, mScarlet-H, mRuby3,  
637 respectively, n = 3. Two-tailed t-tests were performed between mCherry2 and mScarlet, mScarlet-I,  
638 mScarlet-H, mRuby3, respectively, n = 3.  
639

|              | mScarlet | mScarlet-I | mScarlet-H | mKate2  | FusionRed-MQV | mCherry2 | mRuby3  | mApple  | tdTomato |
|--------------|----------|------------|------------|---------|---------------|----------|---------|---------|----------|
| Fluorescence |          |            |            |         |               |          |         |         |          |
| Intensity    | 321.400  | 277.300    | 314.200    | 298.100 | 314.400       | 332.200  | 395.900 | 317.100 | 325.000  |
|              | 296.800  | 281.100    | 319.100    | 297.800 | 272.400       | 308.000  | 385.100 | 312.300 | 325.200  |
|              | 333.600  | 285.700    | 309.500    | 305.300 | 283.900       | 297.300  | 407.500 | 309.300 | 295.700  |
| Mean         | 317.267  | 281.367    | 314.267    | 300.400 | 290.233       | 312.500  | 396.167 | 312.900 | 315.300  |
| s.d.         | 18.745   | 4.206      | 4.800      | 4.246   | 21.704        | 17.880   | 11.202  | 3.934   | 16.974   |
| P value      | 0.00637  | 0.00114    | 0.00216    | 0.00177 | 0.00492       | 0.00435  |         | 0.00282 | 0.00388  |

640 **Table S6.** Statistics for fluorescence intensity comparison of RFPs after 1% OsO<sub>4</sub> post-fixation and  
641 dehydration treatment. Two-tailed t-tests were performed between mRuby3 and other RFPs, n = 3.  
642



---

|                 | mScarlet | mScarlet-I | mScarlet-H | mKate2   | FusionRed-MQV | mCherry2 | mRuby3   | mApple   | tdTomato |
|-----------------|----------|------------|------------|----------|---------------|----------|----------|----------|----------|
| Thermostability |          |            |            |          |               |          |          |          |          |
| Ratio           | 0.840    | 0.682      | 0.994      | 0.071    | 0.022         | 0.214    | 0.852    | 0.550    | 0.794    |
|                 | 0.842    | 0.742      | 0.959      | 0.071    | 0.021         | 0.206    | 0.856    | 0.575    | 0.728    |
|                 | 0.856    | 0.750      | 0.975      | 0.066    | 0.021         | 0.205    | 0.822    | 0.603    | 0.761    |
| Mean            | 0.846    | 0.725      | 0.976      | 0.069    | 0.021         | 0.208    | 0.843    | 0.576    | 0.761    |
| s.d.            | 0.009    | 0.037      | 0.017      | 0.003    | 0.001         | 0.005    | 0.018    | 0.026    | 0.033    |
| P value         | 0.00151  | 0.00223    |            | 8.67E-05 | 0.000109      | 5.71E-05 | 0.000840 | 7.76E-05 | 0.00199  |

---

643 **Table S7.** Statistics for thermostability comparison of RFPs. Two-tailed t-tests were performed  
644 between mScarlet-H and other RFPs, n = 3.  
645

|         | mScarlet | mScarlet-I | mScarlet-H | mKate2   | FusionRed-MQV | mCherry2 | mRuby3   |
|---------|----------|------------|------------|----------|---------------|----------|----------|
| Mean    | 238.979  | 283.083    | 327.015    | 210.963  | 153.836       | 136.175  | 158.454  |
| s.d.    | 135.404  | 123.250    | 178.850    | 107.039  | 58.967        | 48.306   | 77.657   |
| P value | 0.000005 | 0.144      |            | 1.78E-09 | 3.23E-21      | 1.89E-25 | 1.19E-18 |

646 **Table S8.** Statistics for fluorescence intensity comparison of RFPs after EM sample preparation. Mann-  
647 Whitney U tests were performed between mScarlet-H and each RFP, n = 106.  
648

|         | mScarlet | mScarlet-I | mScarlet-H | mKate2  | FusionRed-MQV | mCherry2 | mRuby3  |
|---------|----------|------------|------------|---------|---------------|----------|---------|
| t1/e    | 341.040  | 359.090    | 476.280    | 366.780 | 269.560       | 307.030  | 636.990 |
|         | 377.370  | 389.060    | 389.790    | 424.040 | 345.240       | 307.270  | 471.980 |
|         | 351.770  | 353.860    | 452.630    | 426.160 | 273.080       | 327.990  | 527.020 |
|         | 300.120  | 310.990    | 436.420    | 371.070 | 275.120       | 389.660  | 521.720 |
|         | 380.550  | 433.362    | 440.220    | 290.670 | 253.760       | 381.610  | 482.540 |
| Mean    | 344.147  | 366.071    | 443.090    | 362.633 | 267.320       | 366.420  | 510.427 |
| s.d.    | 32.610   | 45.379     | 31.644     | 55.259  | 35.600        | 40.197   | 65.429  |
| P value | 0.0470   | 0.162      |            | 0.176   | 6.37E-05      | 0.0508   | 0.0299  |

649 **Table S9.** Statistics for photostability comparison of RFPs. Two-tailed t-tests were performed between

650 mScarlet-H and other RFPs, n = 3.

651

652

|                | mEosEM-OFF | mEosEM-E-OFF |
|----------------|------------|--------------|
| Contrast Ratio | 2.130      | 2.086        |
|                | 2.812      | 1.651        |
|                | 1.921      | 1.931        |
|                | 1.716      | 2.020        |
|                | 1.416      | 1.899        |
|                | 1.746      | 2.978        |
|                | 1.478      | 2.263        |
|                | 1.524      | 1.966        |
|                | 1.593      | 2.061        |
| mean           | 1.815      | 2.095        |
| s.d.           | 0.436      | 0.370        |
| P value        | 0.162      |              |

653 **Table S10.** Statistics for SBR comparison between mEosEM and mEosEM-E in OFF images. Two-  
654 tailed t-test was performed between mEosEM and mEosEM-E, n = 9.

655

|                | mEosEM-ON | mEosEM-E-ON |
|----------------|-----------|-------------|
| Contrast Ratio | 3.684     | 5.785       |
|                | 5.321     | 4.731       |
|                | 3.336     | 7.015       |
|                | 2.604     | 7.132       |
|                | 2.035     | 5.406       |
|                | 2.792     | 8.000       |
|                | 2.304     | 6.488       |
|                | 2.251     | 6.808       |
|                | 2.039     | 6.655       |
| mean           | 2.930     | 6.447       |
| s.d.           | 1.062     | 0.990       |
| P value        | 1.94E-06  |             |

656 **Table S11.** Statistics for SBR comparison between mEosEM and mEosEM-E in ON images. Two-  
657 tailed t-test was performed between mEosEM and mEosEM-E, n = 9.  
658

|              | mScarlet | mScarlet-l | mScarlet-H | mKate2   | FusionRed-MQV | mCherry2 | mRuby3   | mApple   | tdTomato |
|--------------|----------|------------|------------|----------|---------------|----------|----------|----------|----------|
| Fluorescence |          |            |            |          |               |          |          |          |          |
| Intensity    | 2928     | 3256       | 1453       | 1406     | 1568          | 1752     | 3011     | 3364     | 4674     |
|              | 2906     | 3269       | 1457       | 1344     | 1763          | 1715     | 3100     | 3423     | 4637     |
|              | 2887     | 3449       | 1348       | 1401     | 1719          | 1781     | 3104     | 3465     | 4643     |
| Mean         | 2907     | 3324.667   | 1419.333   | 1383.667 | 1683.333      | 1749.333 | 3071.667 | 3417.333 | 4651.333 |
| s.d.         | 20.51828 | 107.8718   | 61.80885   | 34.44319 | 102.2758      | 33.08071 | 52.57693 | 50.73789 | 19.85783 |

659 **Table S12.** Statistics for fluorescence intensity comparison of RFPs in live cells. n = 3.

660

|              | mScarlet | mScarlet-l | mScarlet-H | mKate2   | FusionRed-MQV | mCherry2 | mRuby3   | mApple   | tdTomato |
|--------------|----------|------------|------------|----------|---------------|----------|----------|----------|----------|
| Fluorescence |          |            |            |          |               |          |          |          |          |
| Intensity    | 1490     | 1819       | 955.6      | 651.3    | 1117          | 974.2    | 1995     | 703.9    | 1860     |
|              | 1483     | 1903       | 966.4      | 639.8    | 1228          | 1019     | 2198     | 715.2    | 2041     |
|              | 1450     | 1841       | 924.8      | 642.8    | 1178          | 1041     | 2000     | 803.6    | 1745     |
| Mean         | 1474.333 | 1854.333   | 948.9333   | 644.6333 | 1174.333      | 1011.4   | 2064.333 | 740.9    | 1882     |
| s.d.         | 21.36196 | 43.55839   | 21.58642   | 5.965177 | 55.59077      | 34.04233 | 115.7857 | 54.59295 | 149.2213 |

661 **Table S13.** Statistics for fluorescence intensity comparison of RFPs after pre-fixation. n = 3.

662

|              | mScarlet | mScarlet-l | mScarlet-H | mKate2   | FusionRed-MQV | mCherry2 | mRuby3   | mApple   | tdTomato |
|--------------|----------|------------|------------|----------|---------------|----------|----------|----------|----------|
| Fluorescence |          |            |            |          |               |          |          |          |          |
| Intensity    | 429.100  | 583.500    | 648.900    | 685.600  | 518.800       | 938.800  | 1553.000 | 1153.000 | 680.100  |
|              | 442.600  | 491.500    | 604.900    | 681.800  | 487.400       | 878.500  | 1615.000 | 917.600  | 650.000  |
|              | 440.500  | 780.200    | 639.500    | 665.700  | 483.300       | 823.900  | 1525.000 | 865.900  | 549.900  |
| Mean         | 437.400  | 618.400    | 631.100    | 677.700  | 496.500       | 880.400  | 1564.333 | 978.833  | 626.667  |
| s.d.         | 7.264    | 147.480    | 23.172     | 10.565   | 19.421        | 57.474   | 46.058   | 153.032  | 68.164   |
| P value      | 0.000420 | 0.00461    | 8.06E-05   | 0.000526 | 0.000102      | 0.000119 |          | 0.0157   | 0.000101 |

663 **Table S14.** Statistics for fluorescence intensity comparison of RFPs after dehydration treatment. Two-  
664 tailed t-tests were performed between mRuby3 and other RFPs, n = 3.  
665



|         | mScarlet | mScarlet-l | mScarlet-H | mKate2   | FusionRed-MQV | mCherry2 | mRuby3   |
|---------|----------|------------|------------|----------|---------------|----------|----------|
| Mean    | 1.791    | 1.910      | 2.034      | 1.706    | 1.524         | 1.456    | 1.541    |
| s.d.    | 0.385    | 0.335      | 0.495      | 0.307    | 0.181         | 0.147    | 0.237    |
| P value | 0.000009 | 0.182      |            | 6.14E-09 | 8.95E-22      | 6.34E-27 | 1.64E-18 |

666 **Table S15.** Statistics for SBR comparison of RFPs after EM sample preparation. Mann-Whitney U  
667 tests were performed between mScarlet-H and each RFP, n = 106.

668

669
